1           **Developmental regulation of oocyte lipid uptake via ‘patent’ tricellular**  
2                                   **junctions in *Drosophila* epithelium**

3                                   Sarayu Row<sup>1</sup> and Wu-Min Deng<sup>1,2,\*</sup>

4  
5   **Affiliations**

6   <sup>1</sup>Department of Biological Science, Florida State University, Tallahassee, FL 32306-4295, USA

7   <sup>2</sup>Department of Biochemistry and Molecular Biology, Tulane University School of Medicine,  
8   New Orleans, LA 70112, USA

9   \*Correspondence to: [wdeng7@tulane.edu](mailto:wdeng7@tulane.edu)

10   **Abstract**

11   Epithelia form protective permeability barriers that selectively allow the exchange of material  
12   while maintaining tissue integrity under extreme mechanical, chemical, and bacterial loads.

13   Here, we report in the *Drosophila* follicular epithelium a developmentally regulated and  
14   evolutionarily conserved process, ‘patency’, wherein a breach is created in the epithelium at  
15   tricellular junctions during mid-vitellogenesis. Crucial for lipid uptake by the oocyte, patency is  
16   also exploited by endosymbionts. Our findings in this study reveal a novel developmentally  
17   regulated trans-epithelial transport mechanism in a classic model system.

18   **One sentence summary**

19   Follicular Patency for Oocyte lipid uptake

20   **Main text**

21           Epithelial integrity is maintained through cell division, apoptosis, and morphogenetic  
22   movements (1,2), and the preservation of tricellular junctions (TCJs) is key to its physical and  
23   electrochemical barrier function (3). Failure to maintain TCJs can disrupt epithelial integrity and

24 have catastrophic consequences such as metastatic cancer (4,5) and Crohn's disease (6). The  
25 epithelium is also permeable, allowing selective passage of material via transcellular and  
26 paracellular routes (7). The *Drosophila* follicular epithelium (FE) surrounding developing egg  
27 chambers provides an attractive model to study the balance between barrier function and  
28 permeability in epithelia. The FE monolayer protects and supports germline development while  
29 going through a series of spatiotemporally regulated morphogenetic movements (8), and also  
30 secretes the chorion, or eggshell (9). Vitellogenic stages (stage (St) 8-12) are characterized by the  
31 trans-epithelial movement of hemolymph-borne yolk proteins (YPs) into the oocyte. YPs are  
32 synthesized primarily in the fat body, secreted into the hemolymph, and travel between the  
33 follicle cells to reach the oocyte membrane, and are internalized via receptor-mediated  
34 endocytosis (10-12). The FE also synthesizes YPs in small amounts until St11 when it switches  
35 to chorion secretion (13, 14). Other materials carried by the hemolymph have been postulated to  
36 enter the oocyte, such as lipophorins and endosymbionts (15,16), but the mechanistic details of  
37 trans-epithelial FE transport remain unclear.

38         While examining wildtype (WT) FE, we noticed an anomalous but consistent feature —  
39 the opening of tricellular junctions (TCJs) in mid-vitellogenic FE extending from the basal to the  
40 apical domain of the epithelial monolayer [Fig.1(A-D''), Fig.S1(B)], effectively creating a breach  
41 in the epithelium. We confirmed the presence of TCJ gaps using a milder detergent-free  
42 immunostaining protocol, and electron microscopy [Fig.S1(A-A''), Fig.1(E-E')]. A phenomenon  
43 termed 'patency' has been described in other insect species, characterized by the opening of  
44 intercellular junctions between follicle cells for yolk uptake in vitellogenic stages (17). We  
45 therefore deduced that the *Drosophila* FE also exhibits follicular patency.

46 Unlike in other insects (e.g., *R. proxilus*) where patency is present in most vitellogenic  
47 stages (18), we found that patent TCJs in *Drosophila* FE are present only during mid-vitellogenic  
48 stages (St10a and 10b), suggesting a more limited temporal range [Fig.2(A-E’)].  
49 Immunostaining with various epithelial markers revealed a dynamic pattern of TCJs in the FE  
50 over the course of patency [Fig.S2(A-P’)]. Septate junctions, marked by Discs large (Dlg), lose  
51 their connections at TCJs during patent stages and are reconnected at stage 11 when the gaps  
52 disappear [Fig.S2.(A-D’)]. Adherens junctions, represented by E-cadherin (E-cad), are removed  
53 from TCJs in patent epithelia, and reappear when patency is terminated [Fig.S2.(E-H’)]. In  
54 contrast, cortical F-actin remains intact and continuous through mid-vitellogenesis, indicating  
55 maintenance of tissue integrity even in patent FE [Fig.S2.(I-L’)]. The TCJ septate junction  
56 protein Gliotactin (Gli), however, only appears at the TCJs starting at late stage 10b [Fig.S2.(M-  
57 P’)], coincident with the cessation of patency. Gli is required at TCJs for epithelial barrier  
58 function (19), and we found that FE expressing *gli-RNAi* presented patent TCJs even at St11  
59 [Fig.S2.(Q-Q’)]. The accumulation of Gli at TCJs at the termination of patency therefore  
60 suggests reinforcement of the TCJs at the end of patency, tipping the functional balance of the  
61 FE away from trans-epithelial transport, and in favor of barrier function for the remainder of  
62 oogenesis.

63 Next, to determine how patency is temporally regulated, we performed an RNAi screen  
64 for transcription factors known to be active during mid-oogenesis, and identified Tramtrack69  
65 (Ttk69) - a zinc-finger transcription factor that coordinates FE morphogenesis by regulating the  
66 expression levels and localization of adhesion proteins such as E-Cad (20,21). Ttk69, previously  
67 reported to be expressed starting at St10a, is also expressed during pre- and early vitellogenic  
68 stages [Fig.S3.(A-D’)], and knocking down *ttk69* resulted in a larger temporal range of patency,

69 with ectopic TCJ gaps ranging from St9-11 [Fig.2.(F-I'')]. Similar to normal patent FE  
70 [Fig.S2.(F-G'')], *ttk69*-knockdown FE with premature patency exhibited a lack of E-cad at TCJs  
71 [Fig.S3.(E-F'')], suggesting that Ttk69 plays a role in restricting the temporal range of patency  
72 in the FE.

73 Patency also shows a spatial pattern in the FE - specifically, the dorsal-anterior region has  
74 intact TCJs while the rest of the FE TCJs are patent at St10b [Fig.3.(A-B'', G-G'')]. The  
75 *Drosophila* FE is patterned along the anteroposterior and dorsoventral axes by the BMP (Bone  
76 Morphogenetic Protein) or Decapentaplegic (Dpp), and Epidermal Growth Factor Receptor  
77 (EGFR) pathways, creating a well-characterized subset of cells in the dorsal anterior with  
78 elevated levels of adhesion proteins (eg., E-cad, Fasciclin 3 (Fas3)) (22-24) [Fig.S4.(A-B'')].  
79 Ectopic expression of Dpp in the whole FE resulted in elevated E-cad and Fas3 levels across the  
80 FE [Fig.S4.(F-G'')], and all TCJs remained intact at St10a [Fig.3.(C-D'', H-H'')]. In contrast,  
81 removal of EGF signaling by expressing a dominant negative form of EGFR in the FE resulted in  
82 the loss of E-cad and Fas3, and ectopic patency in the dorsal anterior FE, thus eliminating the  
83 spatial pattern of patency [Fig.S4.(H-I''), Fig.3.(E-F'', I-I'')]. Together, our data indicate that the  
84 spatial distribution of patency in the FE is largely regulated by Dpp and EGFR signaling.

85 During oogenesis, lipid levels show a marked increase in the oocyte at St10a (25), which,  
86 incidentally, is also when TCJ gaps appear in the FE, and we therefore hypothesized that lipids  
87 are transferred across the FE into the oocyte via patency. Indeed, our TEM pictures showed  
88 material that could possibly be lipids in the gaps of patent FE [Fig. S1.(C)]. Further investigation  
89 using neutral lipid dyes Nile red and BODIPY revealed that lipids were in fact present in the TCJ  
90 gaps, and appeared to be moving across the epithelium through the gaps [Fig.4.(A-C'')].  
91 Additionally, in egg chambers with FE lacking patency, the oocyte lipid levels were significantly

92 reduced at St10a [Fig.4.(D-E”)], suggesting that follicular patency is necessary for oocyte lipid  
93 uptake. Recently, the hormone ecdysone has been shown to induce lipid uptake at St10a by an  
94 unknown mechanism (25). When we expressed a dominant negative form of the ecdysone  
95 receptor EcR B1, the FE showed no signs of patency [Fig.S5]. Along with our lipid data, we thus  
96 propose that patency is the mechanism by which the St10a oocyte accumulates lipids under  
97 ecdysone regulation.

98 Endosymbionts also enter the oocyte from the maternal hemolymph in mid-vitellogenesis  
99 (16), and we asked whether patency assists in this vertical transfer. Staining egg chambers for the  
100 endosymbiont *Spiroplasma poulsonii*, we found that some bacteria are present between the follicle  
101 cells prior to the onset of patency, while heavily populating the TCJ gaps at St10a and 10b (16)  
102 [Fig.S6.(A-B”)]. In FE lacking patency, *S. poulsonii* was still detected between the follicle cells  
103 as in earlier stages of vitellogenesis [Fig.S6.(C-D”)]. These data suggest that patency is an  
104 advantage rather than a dependence for vertical transmission.

105 In summary, the FE, whose primary function is to maintain an intact shield around the  
106 egg chamber, is developmentally perforated with TCJ gaps essential for lipid transport. We  
107 illustrate spatiotemporal regulation of patency on a global scale by ecdysone signal, at a local  
108 level by the axial patterning signals of the FE (Dpp and EGFR), and at a transcriptional level by  
109 Ttk69. These signals together regulate TCJ openings to allow trans-epithelial transport of lipids  
110 [model in Fig.S7]. Although Ttk69 is placed directly downstream of Ecdysone activation in later  
111 oogenesis (21), our data suggests a more complex interaction for the regulation of patency. The  
112 presence of the extracellular matrix protein Laminin in the gaps [Fig S8] indicates the possibility  
113 of basement membrane components also being transported across the epithelium, perhaps to aid  
114 in the closing or maintenance of the TCJs post-patency. Tissue remodeling via a non-canonical

115 secretion pathway aids in closing ‘open Zones of contact (ZOCs)’, and we propose that these  
116 open ZOCs are indeed the patent TCJs we have characterized here (26). The closely related  
117 species *Drosophila simulans* also exhibits the same spatiotemporal patterns of patency,  
118 indicating evolutionary implications [Fig.S9]. Overall, our studies reveal that patency is not only  
119 a significant non-typical epithelial function that needs detailed characterization, but also a novel  
120 process in an established model system that must be accounted for in future studies.

## 121 **References and Notes**

- 122 1. C. Guillot, T. Lecuit, Mechanics of Epithelial Tissue Homeostasis and Morphogenesis,  
123 *Science*, **340**, 1185-1189 (2013).
- 124 2. K. Tai, K. Cockburn, V. Greco, Flexibility sustains epithelial tissue homeostasis. *Curr Opin*  
125 *Cell Biol.*, **60**, 84–91 (2019).
- 126 3. F. Bosveld, Z. Wang, Y Bellaïche, Tricellular junctions: a hot corner of epithelial biology,  
127 *Curr Opin Cell Biol.*, **54**, 80–88 (2008).
- 128 4. C. Jang, M. Starz-Gaiano, D. J. Montell, Modeling migration and metastasis in *Drosophila*. *J*  
129 *Mammary Gland Biol Neoplasia*, **12**, 103–114 (2007).
- 130 5. S. Dunn, L. Rush, Jin-Yu Lu, T. Xu, Mutations in the *Drosophila* tricellular junction protein  
131 M6 synergize with RasV12 to induce apical cell delamination and invasion. *Proc Natl Acad*  
132 *Sci USA*, **115**, 8358–8363 (2018).
- 133 6. K. J. Maloy, F. Powrie, Intestinal homeostasis and its breakdown in inflammatory bowel  
134 disease. *Nature*, **474**, 298–306 (2011).
- 135 7. D. W. Powell, Barrier function of epithelia, *Am. J. Physiol.*, **241**, G275-G288 (1981).
- 136 8. L. L. Dobens, L. A. Raftery, Integration of epithelial patterning and morphogenesis in  
137 *Drosophila* ovarian follicle cells, *Dev Dyn.*, **218**, 80-93 (2000).

- 138 9. R. C. King, E. A. Koch, Studies on the ovarian follicle cells of *Drosophila*, *Q. J. Microsc.*  
139 *Sci.*, **104**, 297-320 (1963).
- 140 10. P. J. DiMario, A. E. Mahowald, Female sterile (1) yolkless: A recessive female sterile  
141 mutation in *Drosophila melanogaster* with depressed numbers of coated pits and coated  
142 vesicles within the developing oocytes. *J. Cell Biol.*, **105**, 199-206 (1987).
- 143 11. M. Bownes, E. Ronaldson, D. Mauchline, A. Martinez, Regulation of vitellogenesis in  
144 *Drosophila*, *International Journal of Insect Morphology and Embryology*, **22**, 349-367  
145 (1993).
- 146 12. D. S. Richard, M. Gilbert, B. Crum, D. M. Hollinshead, S. Schelble, D. Scheswohl, Yolk  
147 protein endocytosis by oocytes in *Drosophila melanogaster*: immunofluorescent localization  
148 of clathrin, adaptin and the yolk protein receptor, *J. Insect Physiol.*, **47**, 715-723 (2001).
- 149 13. A. J. Weiner, T. J. Goralsky, A.P. Mahowald, The follicle cells are a major site of  
150 vitellogenin synthesis in *Drosophila*. *Dev Bio.*, **89**, 225-236 (1982).
- 151 14. P. G. Isaac, M. Bownes, Ovarian and Fat-Body Vitellogenin Synthesis in *Drosophila*  
152 *melanogaster* *Eur. J. Biochem.*, **123**, 527-534 (1982).
- 153 15. M. Tufail, M. Takeda, Insect vitellogenin/lipophorin receptors: Molecular structures, role in  
154 oogenesis, and regulatory mechanisms, *J. Insect Physiol.*, **55**, 88-104 (2009).
- 155 16. J. K. Herren, J. C. Paredes, F. Schüpfer, B. Lemaitre, Vertical transmission of a *Drosophila*  
156 endosymbiont via cooption of the yolk transport and internalization machinery. *mBio.*, **4**,  
157 e00532-12 (2013).
- 158 17. G. E. Pratt, K. G. Davey, The corpus allatum and oogenesis in *Rhodnius prolixus* (Stål.) 1.  
159 Effects of Allatectomy. *J. Exp. Biol.*, **56**, 201-214 (1972).

- 160 18. E. Huebner, H. S. Injeyan, Patency of the follicular epithelium in *Rhodnius prolixus*: a re-  
161 examination of the hormone response and technique refinement. *Canadian Journal of*  
162 *Zoology*, **58**, 1617-1625 (1980).
- 163 19. J. L. Genova, R. G. Fehon, Neuroglian, Gliotactin, and the Na<sup>+</sup>/K<sup>+</sup> ATPase are essential for  
164 septate junction function in *Drosophila*. *J Cell Biol.*, **161**, 979–989 (2003).
- 165 20. R. L. French, K. A. Cosand, C. A. Berg, The *Drosophila* female sterile mutation twin peaks  
166 is a novel allele of tramtrack and reveals a requirement for Ttk69 in epithelial  
167 morphogenesis. *Dev. Biol.*, **253**, 18-35 (2003).
- 168 21. M. J. Boyle, C. A. Berg, Control in time and space: Tramtrack69 cooperates with Notch and  
169 Ecdysone to repress ectopic fate and shape changes during *Drosophila* egg chamber  
170 maturation. *Development*, **136**, 4187-4197 (2009).
- 171 22. F.S. Neuman-Silberberg, T. Schupbach, The *Drosophila* dorsoventral patterning gene  
172 Gurken produces a dorsally localized RNA and encodes a TGF alpha-like protein. *Cell*, **75**,  
173 165–174 (1993).
- 174 23. V. Twombly, R.K. Blackman, H. Jin, J.M. Graff, R.W. Padgett, W.M Gelbart, The TGF-beta  
175 signaling pathway is essential for *Drosophila* oogenesis. *Development*, **122**, 1555–1565  
176 (1996).
- 177 24. C.A. Berg, The *Drosophila* shell game: patterning genes and morphological change. *Trends*  
178 *Genet.*, **21**, 346–355 (2005).
- 179 25. M. H. Sieber, A. C. Spradling, Steroid Signaling Establishes a Female Metabolic State and  
180 Regulates SREBP to Control Oocyte Lipid Accumulation. *Curr Biol.*, **25**, 993–1004 (2015).
- 181 26. H. Schotman, L. Karhinen, C. Rabouille, dGRASP-mediated noncanonical integrin secretion  
182 is required for *Drosophila* epithelial remodeling. *Dev Cell*, **14**, 171-182 (2008).



183 **Acknowledgements and funding**

184 We thank Drs. V. Auld, C. Berg, D. Houle, B. Lemaitre, R. Xi, Developmental Studies  
185 Hybridoma Bank (DSHB, USA), and Bloomington Drosophila Stock Center (BDSC, USA) for  
186 antibodies and fly stocks. We acknowledge the assistance of the UT Southwestern Electron  
187 Microscopy Core Facility for acquiring TEM images. We thank members of the Deng laboratory  
188 for valuable discussions and support, and P. Michael Albert II for assistance with editing the  
189 manuscript. W.-M. D. is supported by NIH R01 GM072562, R01 CA224381, R01 CA227789  
190 and NSF IOS-1552333.

191 **Author contributions**

192 Conceptualization, methodology, validation, investigation, visualization, project administration:  
193 S.R., W.-M.D.; Writing - original draft: S.R.; Writing - review & editing: S.R., W.-M.D.;  
194 Supervision, funding acquisition: W.-M.D.

195 **Competing interests**

196 The authors declare no competing interests.

197 **Data and material availability**

198 All data is available in the manuscript or the supplementary materials.

199 **Supplementary Materials**

200 Materials and Methods

201 Figures S1-S9

202 References (27-34)

203 **Fig. 1.** Patency in *Drosophila melanogaster*. (A-A') Stage 10a oocyte-associated FE. White box  
204 is expanded in (B-D''). (B-B'', C-C'', D-D'') Basal, lateral, and apical view, respectively, of the  
205 TCJ gaps in oocyte associated FE at St 10a. Hts (Hu li tai shao, adducin) marks the membrane,  
206 DAPI marks the nuclei. (E-E') TEM images of the surface of a St10a FE. TCJ gaps indicated by  
207 red arrowheads.

208 **Fig. 2.** Temporal range of patency and regulation by Ttk69. (A-D) Projections of St9-St11 egg  
209 chambers. Regions in the white box are expanded in (A'-A''' to D'-D'''). Intact TCJs at stages 9  
210 and 11 (yellow arrowheads in A'' and D'' respectively), and patent TCJs at stages 10a and 10b  
211 (red arrowheads in B'' and C'' respectively). (E-E''') Illustrations of FE at stages 9 through 11  
212 depicting intact and patent TCJs. (F-I''') *UAS-ttk69-RNAi* expressing FE under *Tj>Gal4*, marked  
213 by *UAS-GFP*. *ttk69* KD St9 (F-F'') and St11 (H-H'') egg chambers; white boxes are enlarged in  
214 (G-G''') and (I-I''') respectively, both showing ectopic gaps (white arrowheads).

215 **Fig. 3.** Spatial pattern of follicular patency and regulation (A-A'') Dorsal view of a St10b egg  
216 chamber. Box#1 in the dorsal-anterior is enlarged in (B-B') showing intact TCJs (yellow  
217 arrowheads); box#2 in the dorsal posterior is enlarged in (B''-B''') showing patent TCJs (red  
218 arrowheads). (C-C') Dorsal view of a *UAS-Dpp* expressing FE. White box is enlarged in (D-D'')  
219 showing absence of patency (yellow arrowheads) (E-E') Dorsal view of *UAS-EGFR<sup>DN</sup>*  
220 expressing FE. White box is enlarged in (F-F'') showing ectopic patency in the dorsal anterior  
221 (directly above the oocyte nucleus) (red arrowheads). (G-I') Illustration of the spatial pattern of  
222 patency, with yellow dots marking intact TCJs, and red dots marking patent TCJs in WT (G-G'),  
223 *UAS-Dpp* (H-H'), and *UAS-EGFR<sup>DN</sup>* (I-I') expressing FE.

224 **Fig. 4.** Patency for lipid uptake by the oocyte at St10a. (A-C''') Lipids are present in the gaps in  
225 patent FE. (A-B''') Nile red staining shows lipids in the TCJ gaps, and spanning the FE. Basal

226 and cross section views (A'-A''', B' – B''') respectively). CD8-GFP marks the membrane. (C-  
227 C''') BODIPY493/503 (green) confirms presence of lipids in the gaps. Membrane is marked by  
228 Hts (red). BODIPY staining of control WT St10a egg chamber (D-D'') and *UAS-Dpp* expressing  
229 FE lacking patency showing reduced levels of oocyte lipids at St10a (E-E''). Note FE lipid  
230 globules are present in both. DAPI marks the nuclei.

Fig. 1.

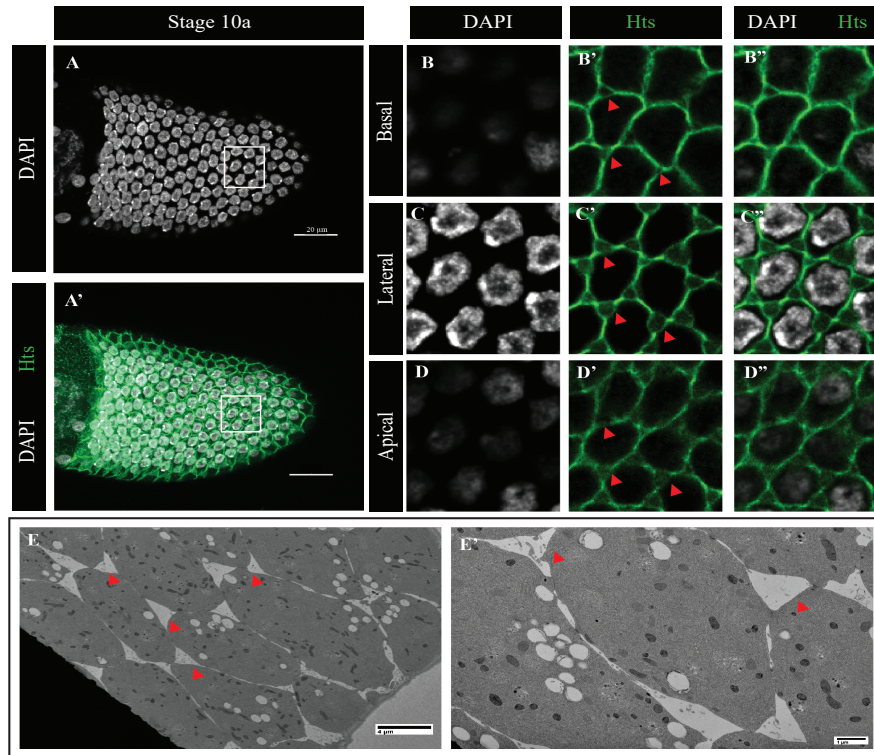

Fig. 2.

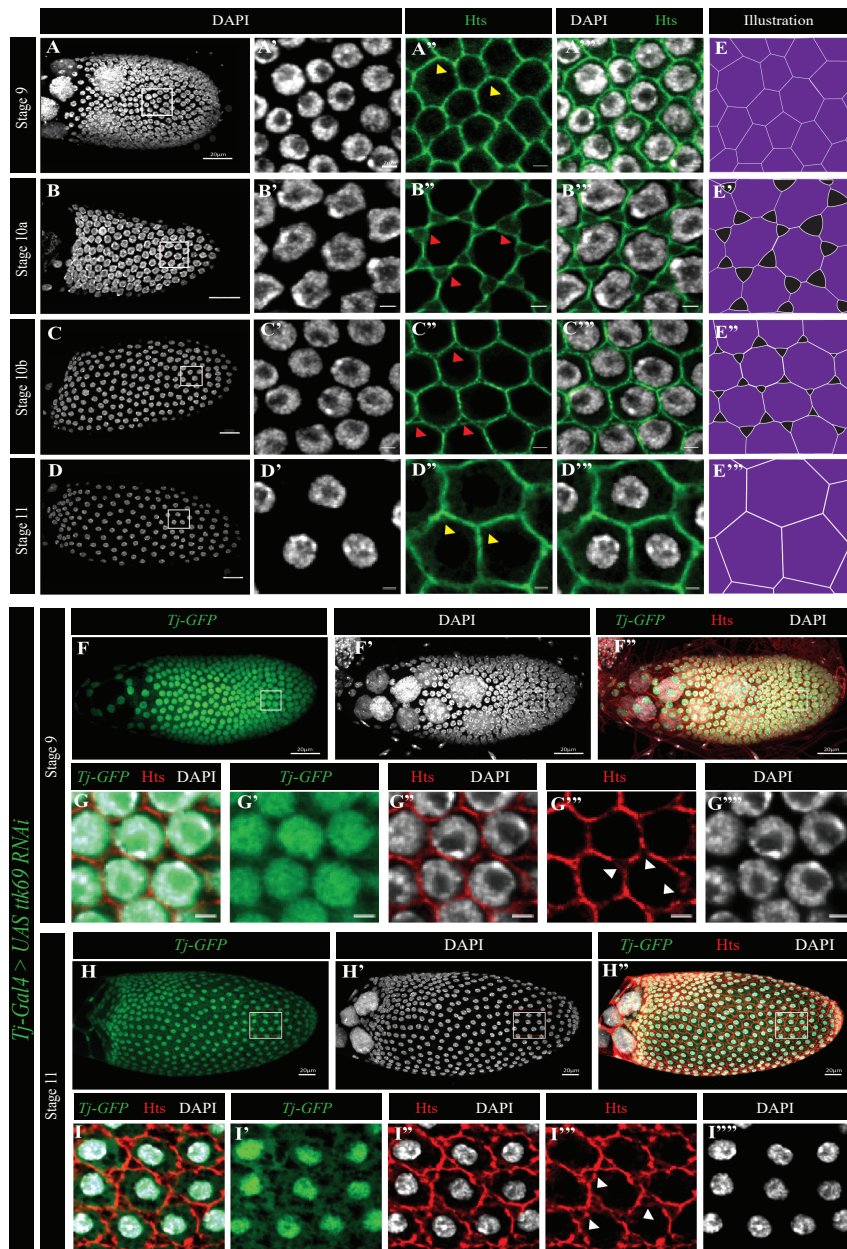

Fig. 3.

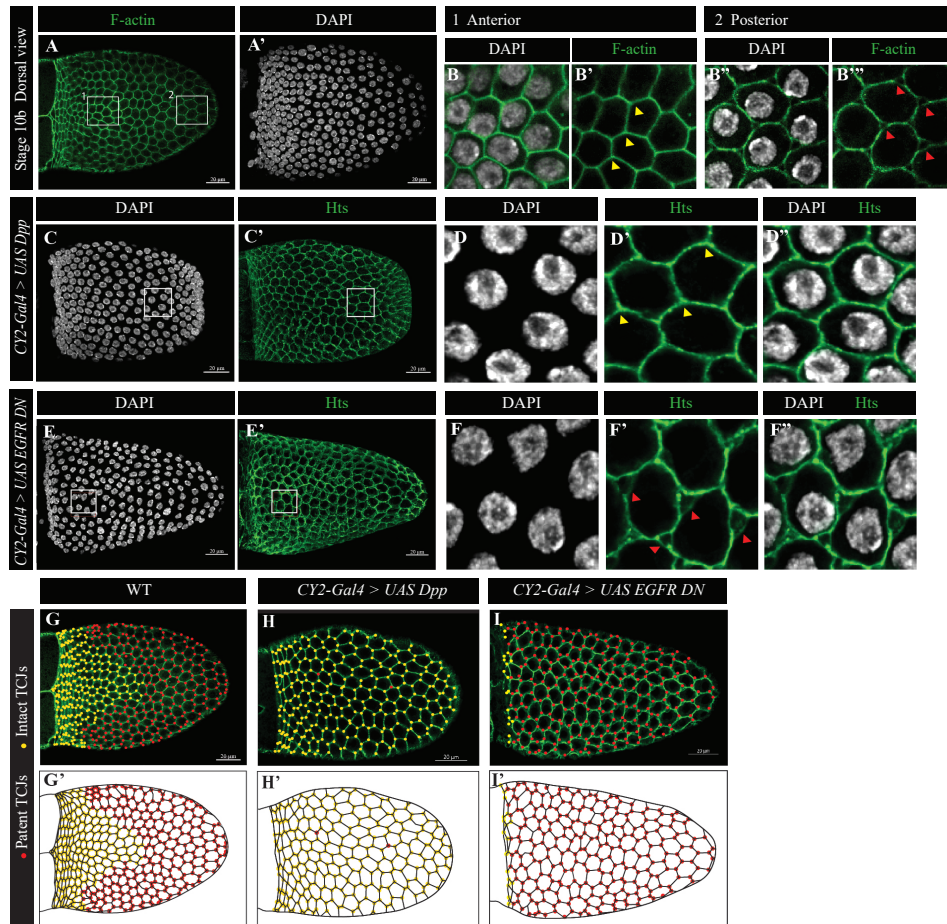

Fig. 4.

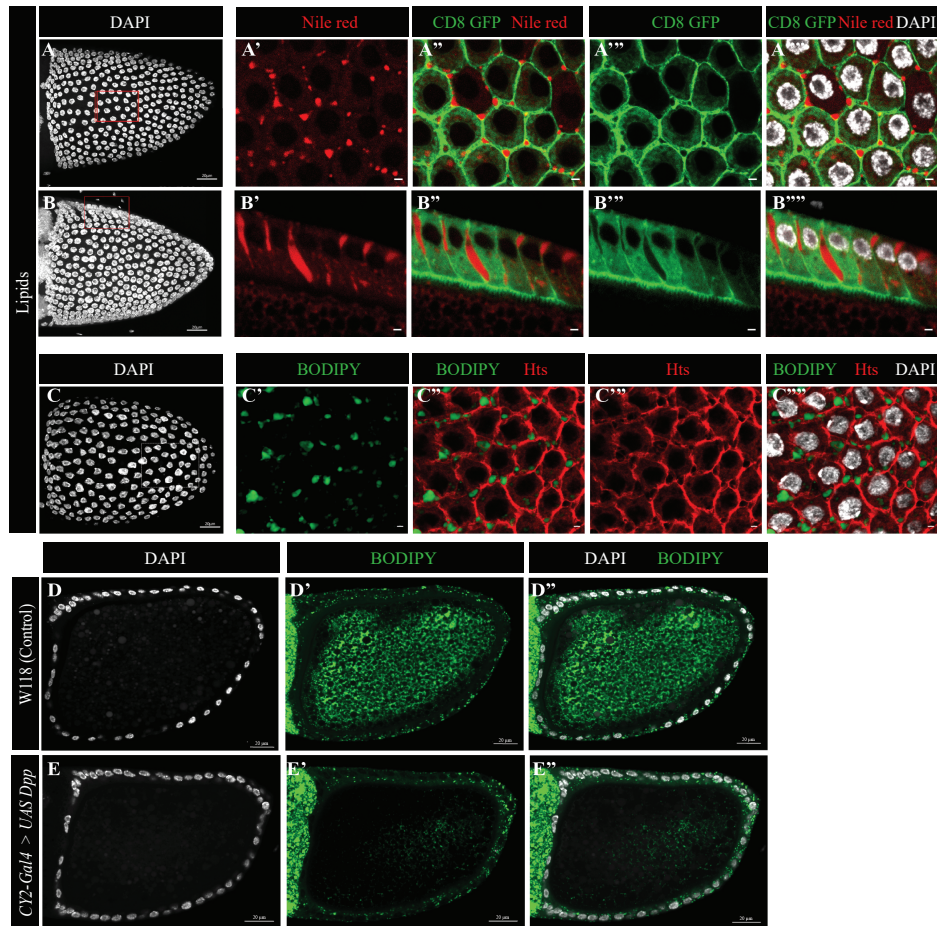

Source: https://www.biorxiv.org/content/10.1101/2019.12.31.891838v1.full.pdf
